# Supplementary material for: Variations of dissolved greenhouse gases (CO 2 , CH 4 , N 2 O) in the Congo Rivernetwork overwhelmingly driven by fluvial-wetland connectivity
Source: Copernicus journal article supplement (doi:10.5194/bg-2019-68), 2019-03-04
Supplement: Supplementary file 1 [file bg-2019-68-supplement.zip]

Archive with 2 entries (2 files):
- Supplemental Information File - Figures.pdf
- Supplemental Information File - Spatial Analysis.pdf
